# Supplementary material
Source: Elsevier journal article supplement (https://www.sciencedirect.com/science/article/pii/S0212656720300755)
Supplement: mmc1 [file S0212656720300755:mmc1.docx]

**Material para la versión electrónica**

Tabla I: Número de IPTs y media de estudios incluidos por subgrupo ATC y fase

| **Subgrupo** | **Indicación** | **Fase II** | | **Fase III†** | |
| --- | --- | --- | --- | --- | --- |
| **ATC** |  | **Nº IPT** | **x̄**†† **estudios** | **Nº IPT** | **x̄**†† **estudios** |
| **A10** | Fármacos usados en diabetes | 0 | - | 15 | 4,7 |
| **A16** | Otros tracto alimentario y metabolismo | 0 | - | 5 | 1,4 |
| **B02** | Antihemorrágicos | 0 | - | 7 | 2,0 |
| **C02** | Antihipertensivos | 0 | - | 3 | 2,3 |
| **C10** | Agentes modificadores de los lípidos | 0 | - | 4 | 4,3 |
| **J01** | Antibacterianos para uso sistémico | 0 | - | 4 | 2,8 |
| **J05** | Antivirales de uso sistémico | 0 | - | 17 | 3,5 |
| **L01** | Agentes antineoplásicos | 17 | 1,5 | 61 | 1,2 |
| **L04** | Inmunosupresores | 3 | 1,3 | 24 | 2,9 |
| **R03** | Agentes padecimientos obstructivos de vías respiratorias | 0 | - | 10 | 3,6 |
| **S01** | Oftalmológicos | 1 | 1 | 3 | 2,3 |

**†**Nota: Los estudios en fase II/III están contabilizados como fase III

†† x̄: media

Tabla II: Media (SD) y mediana (rango intercuartílico [RIC]) de pacientes incluidos en fase II y III, global y para los principales subgrupos ATC

| **Subgrupo** | **Fase II** | |  | **Fase III** | |
| --- | --- | --- | --- | --- | --- |
| **ATC** | **x̄ (SD)†** | **Md (RIC)†** |  | **x̄ (SD) †** | **Md (RIC) †** |
| **A10** | - | - |  | 4499 (3289) | 3200 (1832-6043) |
| **A16** | - | - |  | 144 (56) | 150 (100-188) |
| **B02** | - | - |  | 159 (72) | 165 (126-213) |
| **C02** | - | - |  | 880 (698) | 742 (261-1637) |
| **C10** | - | - |  | 2570 (1921) | 2807 (1248-3891) |
| **J01** | - | - |  | 2034 (648) | 1975 (1549-2520) |
| **J05** | - | - |  | 1797 (766) | 1908 (1178-2175) |
| **L01** | 223 (122) | 225 (148-256) |  | 784 (530) | 675 (392-1033) |
| **L04** | 123,3 (115) | 79 (37-254) |  | 1964 (1195) | 1847 (1039-2720) |
| **R03** | - | - |  | 3586 (2213) | 3076 (2320-4149) |
| **S01** | 32 | - |  | 780 (651) | 741 (150-1450) |
| **Total** | 261 (243) | 225 (126-261) |  | 1618 (1810) | 1072 (542-2027) |

† x̄: media; DE: desviación estándar; Md: mediana; RIC: rango intercuartílico.

Tabla III: Restricciones en IPTs con medicamentos huérfanos.

| **Subgrupo ATC** | **N total** | **No restricción** | **Restricción subgrupo pacientes** | **No financiación** | **No opción preferente** |
| --- | --- | --- | --- | --- | --- |
| Tracto alimentario y metabolismo | 4 | 2 |  | 2 |  |
| Antihemorrágicos | 4 | 1 |  | 3 |  |
| Antihipertensivos | 1 | 1 |  |  |  |
| Homeostasis del calcio | 1 |  |  | 1 |  |
| Antimicóticos de uso sistemico | 1 | 1 |  |  |  |
| Agentes antineoplásicos | 11 | 3 | 5 | 2 | 1 |
| Inmunosupresores | 2 | 1 | 1 |  |  |
| Alteraciones del Sistema musculoesqueletico | 2 |  | 1 | 1 |  |
| Fármacos para sistema nervioso | 1 |  |  | 1 |  |
| Oftalmológicos | 1 |  |  | 1 |  |
| Total † | 28 | 9 | 7 | 11 | 1 |

Figura 1: Tiempo transcurrido desde el inicio hasta el final de la fase I y hasta su publicación, en los principales grupos terapéuticos


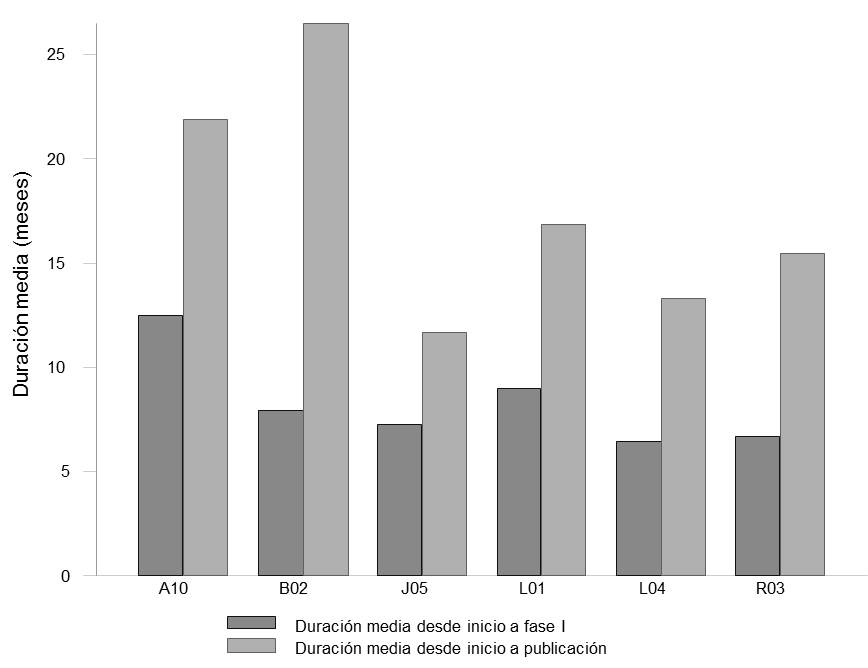
Diferencias en la duración de la fase I (P=NS)

Diferencias hasta la publicación
